# Supplementary material
Source: PubMed Central journal article supplement (PMC3393418)
Supplement: supp_56.7.3700_TableS1-S3.pdf [file supp_56.7.3700_TableS1-S3.pdf]

**AAC00285 - Pharmacodynamic Evaluation of the Activity of Antibiotics against Hemin and Menadione-Dependent Small-Colony Variants of *Staphylococcus aureus* in Models of Extracellular (Broth) and Intracellular (THP-1 Monocytes) infections.**

L.G. Garcia, S. Lemaire, B. C. Kahl, K. Becker, R.A. Proctor, O. Denis, P.M. Tulkens, F. Van Bambeke.

Supplemental Material:**Table S1. MICs of antibiotics against bacterial strains and influence of medium supplementation in menadione sodium bisulfite (MSB) or in hemin (24 h)**

| Antibiotic                                       | MICs (mg/L) at pH 7.4 |                    |                    |                    |                |                                      |
|--------------------------------------------------|-----------------------|--------------------|--------------------|--------------------|----------------|--------------------------------------|
|                                                  | Wild-type             | <i>menD</i> mutant |                    | <i>hemB</i> mutant |                | <i>hemB</i> genetically complemented |
|                                                  |                       | None               | + 2 mg/L menadione | None               | + 2 mg/L hemin |                                      |
| Oxacillin                                        | > 128                 | > 128              | > 128              | > 128              | > 128          | > 128                                |
| Daptomycin                                       | 0.5                   | 0.25               | 0.25               | 0.5                | 0.5            | 1                                    |
| Vancomycin                                       | 1                     | 1                  | 1                  | 1                  | 1              | 1                                    |
| Oritavancin                                      | 0.25                  | 0.03               | 0.03               | 0.125              | 2              | 0.25                                 |
| Ciprofloxacin                                    | 0.125                 | 0.25               | 0.25               | 0.25               | 0.25           | 0.125                                |
| Moxifloxacin                                     | 0.03                  | 0.125              | 0.125              | 0.125              | 0.06           | 0.03                                 |
| Rifampin                                         | 0.016                 | 0.016              | 0.016              | 0.016              | 0.016          | 0.016                                |
| Trimethoprim-sulfamethoxazole (80:16 mass ratio) | 2                     | 4                  | 8                  | 8                  | 2              | 2                                    |
| Gentamicin                                       | 0.25                  | 1                  | 1                  | 0.5                | 0.25           | 0.25                                 |
| Quinupristin-dalfopristin (30:70 mass ratio)     | 0.5                   | 0.125              | 0.125              | 0.125              | 0,5            | 0.5                                  |
| Linezolid                                        | 2                     | 1                  | 2                  | 2                  | 2              | 2                                    |
| Tetracycline                                     | 128                   | 64                 | 64                 | 128                | 128            | 64                                   |
| Tigecycline                                      | 1                     | 0.5                | 0.5                | 0.5                | 2              | 2                                    |
| Azithromycin                                     | 1                     | 128                | 128                | 128                | 128            | 128                                  |

**Table S2. Pertinent regression parameters<sup>a</sup> (with confidence intervals [CI]) for concentration-effects relationships against extracellular bacteria**

| antibiotic   | Wild-type              |              |         | <i>menD</i> mutant     |                           |         | <i>menD</i> supplemented |              |         | <i>hemB</i> mutant     |                           |         | <i>hemB</i> genetically complemented |              |         |
|--------------|------------------------|--------------|---------|------------------------|---------------------------|---------|--------------------------|--------------|---------|------------------------|---------------------------|---------|--------------------------------------|--------------|---------|
|              | $E_{\min}^b$           | $E_{\max}^b$ | $C_s^c$ | $E_{\min}^b$           | $E_{\max}^c$              | $C_s^d$ | $E_{\min}^b$             | $E_{\max}^c$ | $C_s^d$ | $E_{\min}^b$           | $E_{\max}^c$              | $C_s^d$ | $E_{\min}^b$                         | $E_{\max}^c$ | $C_s^d$ |
| Vancomycin   | 2.90<br>(1.42 to 4.37) | <-5          | 0.95    | 2.66<br>(0.93 to 4.39) | -2.42<br>(-4.27 to -0.58) | 1.36    | 3.09<br>(2.27 to 3.90)   | <-5          | 1.21    | 2.74<br>(1.80 to 3.68) | -2.19<br>(-3.06 to -1.32) | 0.91    | 3.45<br>(2.30 to 4.61)               | <-5          | 1.26    |
| Daptomycin   | 3.41<br>(1.63 to 5.18) | <-5          | 0.83    | 2.76<br>(1.89 to 3.63) | <-5                       | 0.48    | 2.79<br>(1.81 to 3.76)   | <-5          | 0.69    | 3.21<br>(2.39 to 4.04) | <-5                       | 0.17    | 3.55<br>(2.70 to 4.40)               | <-5          | 0.31    |
| Gentamicin   | 2.58<br>(1.29 to 3.86) | <-5          | 1.77    | 2.69<br>(1.21 to 4.17) | <-5                       | 0.64    | 2.56<br>(1.88 to 3.24)   | <-5          | 1.01    | 2.86<br>(1.98 to 3.74) | <-5                       | 0.73    | 3.33<br>(1.13 to 5.52)               | <-5          | 1.17    |
| Rifampin     | 1.88<br>(0.10 to 3.67) | <-5          | 3.74    | 1.99<br>(0.17 to 3.81) | <-5                       | 2.83    | 2.04<br>(1.11 to 2.97)   | <-5          | 4.75    | 2.35<br>(1.43 to 3.26) | <-5                       | 3.19    | 2.60<br>(1.64 to 3.56)               | <-5          | 4.66    |
| Moxifloxacin | 3.81<br>(1.22 to 6.40) | <-5          | 1.17    | 2.80<br>(2.37 to 3.22) | <-5                       | 0.59    | 2.73<br>(1.18 to 4.29)   | <-5          | 0.76    | 4.22<br>(1.86 to 6.58) | -4.04<br>(-5.04 to -3.05) | 0.34    | 3.17<br>(1.88 to 4.46)               | <-5          | 2.11    |
| Oritavancin  | 3.23<br>(1.21 to 5.25) | <-5          | 2.16    | 2.70<br>(1.18 to 4.23) | <-5                       | 4.58    | 3.97<br>(2.23 to 3.71)   | <-5          | 4.58    | 3.25<br>(2.36 to 4.14) | <-5                       | 0.67    | 3.58<br>(2.28 to 4.88)               | <-5          | 1.07    |

<sup>a</sup> Calculated based on sigmoidal regressions with an Hill coefficient of 1 for extracellular data and for intracellular data with vancomycin, daptomycin, gentamicin, and rifampin, and based on bi-phasic sigmoidal regressions with Hill coefficients of 1 for intracellular data with moxifloxacin and oritavancin;

<sup>b</sup> Increase in CFU (in  $\log_{10}$  units) from the corresponding original inoculum as extrapolated for infinitely low concentration of antibiotics (mean with 95% confidence interval). All  $R^2$  for fittings are  $\geq 0.79$ ;

<sup>c</sup> Decrease in CFU (in  $\log_{10}$  units) from the corresponding original inoculum as extrapolated for infinitely large concentration of antibiotics (mean with 95% confidence interval; values lower than -5 are not shown as this is our lowest limit of detection);

<sup>d</sup> Concentration (x MIC) resulting in no apparent bacterial growth as determined by graphical interpolation. MIC values used: values at pH 7.4 for extracellular activity; values at pH 5.5 for intracellular activity for all strains by *hemB* mutant, value at pH 5.5 in the presence of hemin for *hemB* mutant based on data of Figure 2 suggesting availability of hemin-like compounds in the cellular medium.

**Table S3. Pertinent regression parameters<sup>a</sup> (with confidence intervals [CI]) for concentration-effects relationships against intracellular bacteria**

| antibiotic   | Wild-type              |                           |         |                   | <i>menD</i> mutant     |                           |         |                   | <i>menD</i> complemented |                           |         |                   | <i>hemB</i> mutant     |                           |         |                   | <i>hemB</i> genetically complemented |                           |         |                   |
|--------------|------------------------|---------------------------|---------|-------------------|------------------------|---------------------------|---------|-------------------|--------------------------|---------------------------|---------|-------------------|------------------------|---------------------------|---------|-------------------|--------------------------------------|---------------------------|---------|-------------------|
|              | $E_{\min}^b$           | $E_{\max}^c$              | $C_s^d$ | Frac <sup>e</sup> | $E_{\min}^b$           | $E_{\max}^c$              | $C_s^d$ | Frac <sup>e</sup> | $E_{\min}^b$             | $E_{\max}^c$              | $C_s^d$ | Frac <sup>e</sup> | $E_{\min}^b$           | $E_{\max}^c$              | $C_s^d$ | Frac <sup>e</sup> | $E_{\min}^b$                         | $E_{\max}^c$              | $C_s^d$ | Frac <sup>e</sup> |
| Vancomycin   | 3.45<br>(2.80 to 4.09) | -0.31<br>(-0.85 to 0.22)  | 5.27    | na                | 1.36<br>(1.14 to 1.58) | -0.74<br>(-0.88 to -0.60) | 0.34    | na                | 3.32<br>(2.94 to 3.71)   | -0.35<br>(-0.69 to -0.01) | 5.94    | na                | 3.34<br>(3.11 to 3.57) | -0.69<br>(-0.84 to -0.53) | 1.11    | na                | 3.06<br>(2.16 to 3.96)               | -1.19<br>(-2.04 to -0.34) | 2.03    | na                |
| Daptomycin   | 3.14<br>(2.88 to 3.41) | -0.85<br>(-1.01 to -0.69) | 1.09    | na                | 1.07<br>(0.27 to 1.86) | -1.59<br>(-2.10 to -1.09) | 0.23    | na                | 3.32<br>(2.79 to 3.84)   | -0.25<br>(-0.46 to -0.05) | 0.87    | na                | 4.08<br>(3.37 to 4.78) | -0.27<br>(-0.56 to 0.03)  | 1.21    | na                | 3.23<br>(2.94 to 3.51)               | -0.86<br>(-1.04 to -0.68) | 0.31    | na                |
| Gentamicin   | 3.57<br>(2.98 to 4.16) | -0.99<br>(-1.24 to -0.74) | 0.15    | na                | 0.88<br>(0.50 to 1.26) | -1.86<br>(-2.38 to -1.33) | 0.03    | na                | 3.13<br>(2.89 to 3.37)   | -0.82<br>(-1.02 to -0.62) | 0.05    | na                | 3.52<br>(3.01 to 3.94) | -0.49<br>(-0.67 to -0.30) | 0.35    | na                | 3.29<br>(2.85 to 3.74)               | -0.73<br>(-0.93 to -0.53) | 0.23    | na                |
| Rifampin     | 2.50<br>(2.18 to 2.81) | -1.75<br>(-1.93 to -1.58) | 66.76   | na                | 0.51<br>(0.07 to 1.10) | -1.43<br>(-1.78 to -1.07) | 25.60   | na                | 2.82<br>(2.36 to 3.28)   | -0.53<br>(-0.66 to -0.39) | 37.41   | na                | 3.02<br>(2.24 to 3.80) | -0.91<br>(-1.15 to -0.67) | 27.18   | na                | 2.28<br>(1.26 to 3.29)               | -1.61<br>(-2.18 to -1.04) | 76.78   | na                |
| Moxifloxacin | 3.34<br>(2.38 to 4.30) | <-2                       | 0.91    | 0.75              | 0.85<br>(0.52 to 1.18) | <-2                       | 0.07    | 0.72              | 4.55<br>(13.8 to 20.1)   | <-2                       | 0.18    | 0.35              | 3.54<br>(-198 to 204)  | -0.99<br>(-1.24 to -0.67) | 0.26    | 0.96              | 3.15<br>(13.8 to 20.1)               | <-2                       | 0.16    | 0.36              |
| Oritavancin  | 2.98<br>(2.77 to 3.20) | <-2                       | 2.51    | 0.63              | 0.77<br>(0.41 to 1.06) | <-2                       | 0.63    | 0.36              | 3.99<br>(24.3 to 32.2)   | <-2                       | 16.6    | 0.27              | 3.51<br>(3.24 to 3.78) | <-2                       | 0.31    | 0.37              | 2.54<br>(2.13 to 2.94)               | <-2                       | 2.14    | 0.64              |

<sup>a</sup> Calculated based on sigmoidal regressions with an Hill coefficient of 1 for extracellular data and for intracellular data with vancomycin, daptomycin, gentamicin, and rifampin, and based on bi-phasic sigmoidal regressions with Hill coefficients of 1 for intracellular data with moxifloxacin and oritavancin;

<sup>b</sup> Increase in CFU (in log<sub>10</sub> units) from the corresponding original inoculum as extrapolated for infinitely low concentration of antibiotics (mean with 95% confidence interval). All R<sup>2</sup> for fittings are ≥ 0.88;

<sup>c</sup> Decrease in CFU (in log<sub>10</sub> units) from the corresponding original inoculum as extrapolated for infinitely large concentration of antibiotics (mean with 95% confidence interval). For moxifloxacin and oritavancin, the values are not shown as we did not have enough data points close to a potential second plateau, making therefore the calculation of  $E_{\max}$  values somewhat unreliable;

<sup>d</sup> Concentration (x MIC) resulting in no apparent bacterial growth as determined by graphical interpolation. MIC values used: values at pH 7.4 for extracellular activity; values at pH 5.5 for intracellular activity for all strains by *hemB* mutant, value at pH 5.5 in the presence of hemin for *hemB* mutant based on data of Figure 2 suggesting availability of hemin-like compounds in the cellular medium;

<sup>e</sup> Proportion of the total response that could be ascribed to the first wave of CFU decrease in the biphasic curve.
